# Supplementary material for: Assessing anxiety, depression and quality of life in patients with peripheral facial palsy: a systematic review
Source: PeerJ journal article supplement (doi:10.7717/peerj.10449), 2020-12-01
Supplement: Supl._file.pdf [file Supl._file.pdf]

## Presence of psychological variables in patients with facial paralysis: A systematic review and meta-analysis.

*Ferran Cuenca-Martínez, Roy La Touche-Arbizu, Eva Zapardiel-Sánchez, Enrique Carrasco-González*

To enable PROSPERO to focus on COVID-19 registrations during the 2020 pandemic, this registration record was automatically published exactly as submitted. The PROSPERO team has not checked eligibility.

### Citation

Ferran Cuenca-Martínez, Roy La Touche-Arbizu, Eva Zapardiel-Sánchez, Enrique Carrasco-González. Presence of psychological variables in patients with facial paralysis: A systematic review and meta-analysis.. PROSPERO 2020 CRD42020159843 Available from: [https://www.crd.york.ac.uk/prospero/display\\_record.php?ID=CRD42020159843](https://www.crd.york.ac.uk/prospero/display_record.php?ID=CRD42020159843)

### Review question

What psychological variables may be involved in patients with facial paralysis?

### Searches

The search for scientific articles will be performed using PubMed, PEDro, Google Scholar and CINAHL.

### Types of study to be included

Observational studies and case-control studies.

### Condition or domain being studied

Facial paralysis and its psychological variables.

### Participants/population

Inclusion criteria: patients with facial paralysis.

Exclusion criteria: patients without facial paralysis.

### Intervention(s), exposure(s)

Patients with facial paralysis and with psychological variables associated.

### Comparator(s)/control

Healthy subjects.

### Main outcome(s)

House-Brackmann Scale, Hospital Anxiety and Depression Scale, Facial Disability Index, Facial Clinimetric Evaluation, Beck Depression Inventory.

#### \* Measures of effect

As given in the source articles.

### Additional outcome(s)

Not applicable.

#### \* Measures of effect

Not applicable.

### Data extraction (selection and coding)

Observational studies and case-control studies.

### Risk of bias (quality) assessment

The risk of bias will be assessed by using the "Modified Newcastle-Ottawa quality assessment scale". This assessment tool consists of a point system for which a study is judged on. It presents 8 items divided

into 3 categories: the selection of the study groups, the comparability of the groups and the ascertainment of either the exposure or outcome of interest for cohort studies. The maximum score a study can receive is 9 points.

### Strategy for data synthesis

The search for scientific articles will perform using PubMed (1950 to November 2019), PEDro (1999 to November 2019), CINAHL (1982 to November 2019) and Google Scholar with an end of November, 2019.

### Analysis of subgroups or subsets

None.

### Contact details for further information

Roy LaTouche-Arbizu  
roylatouche@lasallecampus.es

### Organisational affiliation of the review

Centro Superior de Estudios Universitarios La Salle, Universidad Autónoma de Madrid, Spain

### Review team members and their organisational affiliations

Mr Ferran Cuenca-Martínez. Motion in Brains Research Group, Institute of Neuroscience and Sciences of the Movement (INCIMOV), Centro Superior de Estudios Universitarios La Salle, Universidad Autónoma de Madrid, Spain.

Dr Roy La Touche-Arbizu. Motion in Brains Research Group, Institute of Neuroscience and Sciences of the Movement (INCIMOV), Centro Superior de Estudios Universitarios La Salle, Universidad Autónoma de Madrid, Spain.

Miss Eva Zapardiel-Sánchez. Centro Superior de Estudios Universitarios La Salle, Universidad Autónoma de Madrid, Spain.

Ms Enrique Carrasco-González. Centro Superior de Estudios Universitarios La Salle, Universidad Autónoma de Madrid, Spain.

### Type and method of review

Meta-analysis, Systematic review

### Anticipated or actual start date

25 November 2019

### Anticipated completion date

31 March 2020

### Funding sources/sponsors

No funding sources.

### Conflicts of interest

### Language

English

### Country

Spain

### Stage of review

Review Ongoing

### Subject index terms status

Subject indexing assigned by CRD

### Subject index terms

MeSH headings have not been applied to this record

### Date of registration in PROSPERO

28 April 2020

### Date of first submission

25 November 2019

### Stage of review at time of this submission

The review has not started

| Stage                                                           | Started | Completed |
|-----------------------------------------------------------------|---------|-----------|
| Preliminary searches                                            | No      | No        |
| Piloting of the study selection process                         | No      | No        |
| Formal screening of search results against eligibility criteria | No      | No        |
| Data extraction                                                 | No      | No        |
| Risk of bias (quality) assessment                               | No      | No        |
| Data analysis                                                   | No      | No        |

*The record owner confirms that the information they have supplied for this submission is accurate and complete and they understand that deliberate provision of inaccurate information or omission of data may be construed as scientific misconduct.*

*The record owner confirms that they will update the status of the review when it is completed and will add publication details in due course.*

### Versions

28 April 2020

#### PROSPERO

This information has been provided by the named contact for this review. CRD has accepted this information in good faith and registered the review in PROSPERO. The registrant confirms that the information supplied for this submission is accurate and complete. CRD bears no responsibility or liability for the content of this registration record, any associated files or external websites.
